# Supplementary material for: HDV Can Constrain HBV Genetic Evolution in HBsAg: Implications for the Identification of Innovative Pharmacological Targets
Source: MDPI journal article supplement (doi:10.3390/v10070363), 2018-07-09
Supplement: s1 [file s1]

## A. HBV+HDV Infection

### N-terminus

|     |     |                  |                  |     |     |                   |     |     |                   |     |     |     |     |     |
|-----|-----|------------------|------------------|-----|-----|-------------------|-----|-----|-------------------|-----|-----|-----|-----|-----|
| S55 | P56 | T57 <sub>L</sub> | S58              | N59 | H60 | S61               | P62 | T63 | S64               | C65 | P66 | P67 | T68 | C69 |
| P70 | G71 | Y72              | R73 <sub>H</sub> | W74 | M75 | C76Y <sub>1</sub> | L77 | R78 | R79H <sub>1</sub> | F80 | I81 | I82 | F83 | L84 |
| F85 | I86 | L87              | L88              | L89 | C90 | L91               | I92 | F93 | L94S <sub>1</sub> | L95 | V96 | L97 | L98 |     |

### Major hydrophilic region

|                                                                 |                    |                                   |      |                    |                                                  |                    |                    |      |                    |                    |                    |                    |                                   |      |
|-----------------------------------------------------------------|--------------------|-----------------------------------|------|--------------------|--------------------------------------------------|--------------------|--------------------|------|--------------------|--------------------|--------------------|--------------------|-----------------------------------|------|
| D99                                                             | Y100F <sub>1</sub> | Q101H <sub>2</sub>                | G102 | M103               | L104                                             | P105               | V106               | C107 | P108               | L109               | I110L <sub>1</sub> | P111               | G112R <sub>1</sub> S <sub>1</sub> | S113 |
| S114                                                            | T115               | T116N <sub>1</sub>                | S117 | T118A <sub>1</sub> | G119                                             | P120T <sub>1</sub> | C121               | R122 | T123A <sub>2</sub> | C124Y <sub>1</sub> | T125M <sub>1</sub> | T126S <sub>1</sub> | P127T <sub>6</sub>                | A128 |
| Q129                                                            | G130               | T131N <sub>1</sub> P <sub>1</sub> | S132 | M133I <sub>1</sub> | Y134F <sub>1</sub> N <sub>1</sub> S <sub>1</sub> | P135               | S136Y <sub>1</sub> | C137 | C138               | C139               | T140I <sub>1</sub> | K141               | P142                              | S143 |
| D144                                                            | G145               | N146                              | C147 | T148               | C149                                             | I150               | P151               | I152 | P153               | S154               | S155               | W156               | A157                              | F158 |
| G159A <sub>2</sub> R <sub>2</sub> I <sub>1</sub> V <sub>1</sub> | K160               | F161                              | L162 | W163               | E164D <sub>2</sub> A <sub>1</sub> G <sub>1</sub> | W165               | A166               | S167 | A168               | R169P <sub>1</sub> |                    |                    |                                   |      |

### C-terminus

|                    |                                |                                |                    |                                                  |                    |                                   |                                                                 |                    |                                   |                    |                    |                    |                    |                    |
|--------------------|--------------------------------|--------------------------------|--------------------|--------------------------------------------------|--------------------|-----------------------------------|-----------------------------------------------------------------|--------------------|-----------------------------------|--------------------|--------------------|--------------------|--------------------|--------------------|
| F170               | S171                           | W172 <sup>*</sup> <sub>L</sub> | L173P <sub>1</sub> | S174N <sub>1</sub>                               | L175S <sub>2</sub> | L176                              | V177                                                            | P178               | F179                              | V180               | Q181               | W182               | F183               | V184A <sub>1</sub> |
| G185E <sub>1</sub> | L186R <sub>2</sub>             | S187                           | P188               | T189I <sub>2</sub>                               | V190               | W191 <sup>*</sup> <sub>1</sub>    | L192                                                            | S193L <sub>4</sub> | V194A <sub>1</sub>                | I195M <sub>1</sub> | W196               | M197               | M198               | W199               |
| Y200               | W201                           | G202                           | P203R <sub>2</sub> | S204R <sub>1</sub> N <sub>1</sub> K <sub>1</sub> | L205               | Y206C <sub>2</sub> F <sub>1</sub> | S207R <sub>3</sub> N <sub>2</sub> T <sub>2</sub> L <sub>1</sub> | I208T <sub>3</sub> | L209S <sub>1</sub>                | S210               | P211R <sub>2</sub> | F212L <sub>1</sub> | L213I <sub>4</sub> | P214L <sub>2</sub> |
| L215               | L216 <sup>*</sup> <sub>3</sub> | P217L <sub>4</sub>             | I218               | F219                                             | F220L <sub>1</sub> | C221Y <sub>1</sub>                | L222R <sub>1</sub>                                              | W223               | V224I <sub>1</sub> A <sub>1</sub> | Y225               | I226               |                    |                    |                    |

## B. HBV Mono-Infection

### N-terminus

|                   |     |     |     |     |     |                                  |                   |     |                   |                   |                   |                   |                   |                               |
|-------------------|-----|-----|-----|-----|-----|----------------------------------|-------------------|-----|-------------------|-------------------|-------------------|-------------------|-------------------|-------------------------------|
| S55C <sub>1</sub> | P56 | T57 | S58 | N59 | H60 | S61                              | P62               | T63 | S64Y <sub>1</sub> | C65               | P66               | P67               | T68I <sub>1</sub> | C69 <sup>*</sup> <sub>3</sub> |
| P70               | G71 | Y72 | R73 | W74 | M75 | C76W <sub>1</sub> Y <sub>2</sub> | L77V <sub>1</sub> | R78 | R79               | F80S <sub>2</sub> | I81               | I82               | F83S <sub>1</sub> | L84F <sub>1</sub>             |
| F85Y <sub>1</sub> | I86 | L87 | L88 | L89 | C90 | L91                              | I92T <sub>3</sub> | F93 | L94               | L95               | V96A <sub>1</sub> | L97R <sub>1</sub> | L98               |                               |

### Major hydrophilic region

|                                   |                                   |                    |                                   |                                                  |                                                  |                                                  |                    |                                 |                    |                    |                                   |                                   |                                                                                               |                    |
|-----------------------------------|-----------------------------------|--------------------|-----------------------------------|--------------------------------------------------|--------------------------------------------------|--------------------------------------------------|--------------------|---------------------------------|--------------------|--------------------|-----------------------------------|-----------------------------------|-----------------------------------------------------------------------------------------------|--------------------|
| D99                               | Y100C <sub>1</sub>                | Q101               | G102                              | M103T <sub>1</sub>                               | L104                                             | P105A <sub>1</sub>                               | V106A <sub>1</sub> | C107C <sup>*</sup> <sub>1</sub> | P108               | L109               | I110L <sub>1</sub> M <sub>1</sub> | P111                              | G112R <sub>2</sub> E <sub>2</sub> N <sub>1</sub> S <sub>1</sub> D <sub>1</sub> K <sub>1</sub> | S113               |
| S114T <sub>1</sub>                | T115A <sub>1</sub>                | T116               | S117W <sub>1</sub> G <sub>1</sub> | T118K <sub>2</sub> V <sub>2</sub> A <sub>1</sub> | G119                                             | P120S <sub>2</sub> A <sub>1</sub> T <sub>1</sub> | C121               | R122K <sub>1</sub>              | T123               | C124               | T125M <sub>7</sub>                | T126S <sub>1</sub> I <sub>1</sub> | P127T <sub>12</sub> S <sub>1</sub> A <sub>1</sub>                                             | A128V <sub>2</sub> |
| Q129P <sub>1</sub>                | G130                              | T131N <sub>2</sub> | S132                              | M133L <sub>1</sub> T <sub>1</sub>                | Y134N <sub>1</sub> F <sub>2</sub> S <sub>2</sub> | P135                                             | S136               | C137                            | C138               | C139               | T140                              | K141                              | P142L <sub>1</sub>                                                                            | S143T <sub>1</sub> |
| D144                              | G145R <sub>2</sub>                | N146               | C147Y <sub>1</sub>                | T148                                             | C149                                             | I150T <sub>1</sub>                               | P151               | I152                            | P153               | S154               | S155                              | W156                              | A157                                                                                          | F158L <sub>1</sub> |
| G159A <sub>1</sub> V <sub>1</sub> | K160S <sub>1</sub> N <sub>1</sub> | F161Y <sub>2</sub> | L162                              | W163                                             | E164G <sub>1</sub> D <sub>1</sub> V <sub>1</sub> | W165                                             | A166               | S167                            | A168T <sub>1</sub> | R169H <sub>1</sub> |                                   |                                   |                                                                                               |                    |

### C-terminus

|                                   |                                                                 |                                                             |                                                  |                                                                 |                                                  |                                                                 |                                                                                  |                    |                                   |                                                  |                    |                                   |                    |                                   |
|-----------------------------------|-----------------------------------------------------------------|-------------------------------------------------------------|--------------------------------------------------|-----------------------------------------------------------------|--------------------------------------------------|-----------------------------------------------------------------|----------------------------------------------------------------------------------|--------------------|-----------------------------------|--------------------------------------------------|--------------------|-----------------------------------|--------------------|-----------------------------------|
| F170                              | S171C <sub>1</sub>                                              | W172C <sub>2</sub> S <sub>1</sub> <sup>*</sup> <sub>1</sub> | L173                                             | S174N <sub>1</sub>                                              | L175S <sub>2</sub>                               | L176                                                            | V177A <sub>1</sub> L <sub>1</sub>                                                | P178               | F179                              | V180                                             | Q181               | W182                              | F183C <sub>2</sub> | V184A <sub>2</sub>                |
| G185E <sub>1</sub>                | L186P <sub>2</sub> C <sub>1</sub> A <sub>1</sub> V <sub>1</sub> | S187                                                        | P188                                             | T189I <sub>5</sub>                                              | V190                                             | W191                                                            | L192P <sub>1</sub>                                                               | S193L <sub>3</sub> | V194A <sub>1</sub> I <sub>1</sub> | I195M <sub>1</sub> T <sub>1</sub>                | W196L <sub>2</sub> | M197T <sub>2</sub>                | M198I <sub>1</sub> | W199                              |
| Y200F <sub>6</sub> C <sub>6</sub> | W201                                                            | G202                                                        | P203Q <sub>1</sub> R <sub>1</sub> L <sub>1</sub> | S204N <sub>2</sub> T <sub>2</sub> R <sub>1</sub> I <sub>1</sub> | L205P <sub>1</sub>                               | Y206C <sub>8</sub> H <sub>4</sub> F <sub>2</sub> L <sub>1</sub> | S207N <sub>14</sub> R <sub>11</sub> T <sub>6</sub> H <sub>1</sub> I <sub>1</sub> | I208T <sub>5</sub> | L209W <sub>1</sub> V <sub>1</sub> | S210R <sub>3</sub> K <sub>2</sub> N <sub>1</sub> | P211H <sub>2</sub> | F212L <sub>1</sub> S <sub>1</sub> | L213I <sub>3</sub> | P214Q <sub>1</sub> L <sub>1</sub> |
| L215                              | L216 <sup>*</sup> <sub>3</sub> F <sub>1</sub> S <sub>1</sub>    | P217L <sub>4</sub> A <sub>1</sub> S <sub>1</sub>            | I218                                             | F219S <sub>1</sub>                                              | F220L <sub>4</sub> C <sub>1</sub> Y <sub>1</sub> | C221F <sub>1</sub> Y <sub>1</sub>                               | L222                                                                             | W223               | V224A <sub>1</sub>                | Y225F <sub>2</sub>                               | I226               |                                   |                    |                                   |

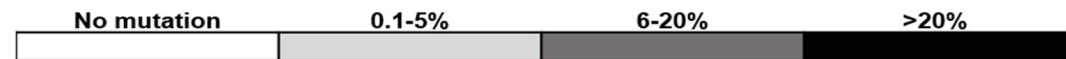

**Figure S1. Frequency of amino acid substitutions detected at each HBsAg genotype-D position.** HBsAg genotype-D protein is colored according to the frequency of mutations observed at each HBsAg position in HBV+HDV infected patients (A) and HBV mono-infected patients (B). Wild-type amino acid is reported on the left while mutated amino acid on the right of each position. The absolute frequency of each mutation is reported in subscript.

|                                                                                                       |                       |                    |                                                  |                                   |                                                                                                            |                                                                 |                                                 |                                                                                                                                          |                                   |                                                                                                |
|-------------------------------------------------------------------------------------------------------|-----------------------|--------------------|--------------------------------------------------|-----------------------------------|------------------------------------------------------------------------------------------------------------|-----------------------------------------------------------------|-------------------------------------------------|------------------------------------------------------------------------------------------------------------------------------------------|-----------------------------------|------------------------------------------------------------------------------------------------|
| RBD start                                                                                             |                       |                    |                                                  |                                   |                                                                                                            |                                                                 |                                                 |                                                                                                                                          |                                   |                                                                                                |
| M1                                                                                                    | S2G <sub>2</sub>      | R3                 | S4                                               | E5                                | S6E <sub>7</sub> R <sub>7</sub> K <sub>6</sub> G <sub>6</sub> A <sub>2</sub> * <sub>2</sub> L <sub>1</sub> | R7K <sub>31</sub> G <sub>1</sub>                                | K8R <sub>1</sub> E <sub>1</sub>                 | N9D <sub>9</sub> K <sub>6</sub> I <sub>3</sub> S <sub>3</sub> Y <sub>1</sub> F <sub>1</sub> G <sub>1</sub> H <sub>1</sub> T <sub>1</sub> | R10S <sub>1</sub>                 | G11R <sub>1</sub>                                                                              |
| G12R <sub>1</sub> N <sub>1</sub> D <sub>1</sub> A <sub>1</sub> V <sub>1</sub>                         | R13K <sub>2</sub>     | E14                | E15D <sub>2</sub> K <sub>1</sub>                 | I16V <sub>26</sub> L <sub>1</sub> | L17                                                                                                        | E18                                                             | Q19E <sub>1</sub>                               | W20R <sub>1</sub> G <sub>1</sub>                                                                                                         | V21I <sub>1</sub>                 | A22S <sub>27</sub> N <sub>16</sub> T <sub>3</sub> I <sub>2</sub> G <sub>1</sub> V <sub>1</sub> |
| G23A <sub>1</sub>                                                                                     | R24KKL <sub>del</sub> | K25R <sub>3</sub>  | K26R <sub>1</sub> Q <sub>1</sub>                 | L27Q <sub>1</sub> S <sub>1</sub>  | E28                                                                                                        | E29D <sub>1</sub>                                               | L30                                             |                                                                                                                                          |                                   |                                                                                                |
| CCS start                                                                                             |                       |                    |                                                  |                                   |                                                                                                            |                                                                 |                                                 |                                                                                                                                          |                                   |                                                                                                |
| E31                                                                                                   | R32K <sub>1</sub>     | D33E <sub>9</sub>  | L34V <sub>1</sub>                                | R35                               | K36R <sub>1</sub>                                                                                          | T37V <sub>28</sub> A <sub>6</sub> I <sub>2</sub> M <sub>1</sub> | K38                                             | K39R <sub>2</sub>                                                                                                                        | K40                               | L41I <sub>38</sub> V <sub>4</sub> M <sub>1</sub>                                               |
| K42R <sub>3</sub> G <sub>1</sub>                                                                      | K43R <sub>4</sub>     | L44F <sub>1</sub>  | E45                                              | D46E <sub>17</sub>                | E47D <sub>36</sub> G <sub>1</sub>                                                                          | N48H <sub>4</sub>                                               | P49L <sub>1</sub> A <sub>1</sub> S <sub>1</sub> | W50                                                                                                                                      | L51P <sub>1</sub>                 | G52E <sub>1</sub>                                                                              |
| N53D <sub>1</sub>                                                                                     | I54V <sub>9</sub>     | K55                | G56                                              | I57                               | L58I <sub>4</sub>                                                                                          | G59                                                             | K60                                             | K61R <sub>1</sub>                                                                                                                        | D62N <sub>2</sub> E <sub>1</sub>  | K63R <sub>9</sub>                                                                              |
| D64G <sub>3</sub>                                                                                     | G65                   | E66G <sub>4</sub>  | G67                                              |                                   |                                                                                                            |                                                                 |                                                 |                                                                                                                                          |                                   |                                                                                                |
| NLS start                                                                                             |                       |                    |                                                  |                                   |                                                                                                            |                                                                 |                                                 |                                                                                                                                          |                                   |                                                                                                |
| A68                                                                                                   | P69L <sub>1</sub>     | P70                | A71S <sub>1</sub>                                | K72                               | R73K <sub>11</sub>                                                                                         | A74P <sub>1</sub>                                               | R75                                             | T76V <sub>5</sub> M <sub>2</sub> A <sub>2</sub> S <sub>1</sub>                                                                           | D77                               | Q78R <sub>3</sub>                                                                              |
| M79                                                                                                   | E80                   | V81I <sub>8</sub>  | D82                                              | S83                               | G84S <sub>1</sub>                                                                                          | P85                                                             | R86G <sub>5</sub>                               | K87R <sub>1</sub>                                                                                                                        | R88                               | P89R <sub>1</sub>                                                                              |
| L90S9A <sub>2</sub> F <sub>1</sub> T <sub>1</sub>                                                     | R91G <sub>1</sub>     | G92                | G93                                              | F94                               | T95                                                                                                        | D96N <sub>1</sub>                                               |                                                 |                                                                                                                                          |                                   |                                                                                                |
| RBD start                                                                                             |                       |                    |                                                  |                                   |                                                                                                            |                                                                 |                                                 |                                                                                                                                          |                                   |                                                                                                |
| K97Q <sub>3</sub> R <sub>2</sub> E <sub>1</sub>                                                       | E98                   | R99                | Q100E <sub>2</sub> R <sub>1</sub> K <sub>1</sub> | D101                              | H102                                                                                                       | R103                                                            | R104                                            | R105K <sub>1</sub>                                                                                                                       | K106R <sub>1</sub> M <sub>1</sub> | A107N <sub>1</sub> T <sub>1</sub> D <sub>1</sub>                                               |
| RBD start                                                                                             |                       |                    |                                                  |                                   |                                                                                                            |                                                                 |                                                 |                                                                                                                                          |                                   |                                                                                                |
| E136D <sub>7</sub>                                                                                    | D137                  | E138K <sub>1</sub> | R139K <sub>6</sub> E <sub>6</sub>                | R140G <sub>1</sub>                | E141K <sub>8</sub>                                                                                         | R142G <sub>4</sub>                                              | R143                                            | V144I <sub>11</sub> T <sub>3</sub> A <sub>2</sub> L <sub>1</sub>                                                                         | A145T <sub>1</sub>                | G146                                                                                           |
| VAS start                                                                                             |                       |                    |                                                  |                                   |                                                                                                            |                                                                 |                                                 |                                                                                                                                          |                                   |                                                                                                |
| P195                                                                                                  | W/*196                | D197               | I198                                             | L199                              | F200L <sub>1</sub> F <sub>1</sub>                                                                          | P201                                                            | A202S <sub>13</sub>                             | D203                                                                                                                                     | P204                              | P205                                                                                           |
| F206                                                                                                  | S207                  | P208               | Q209                                             | S210G <sub>1</sub>                | C211S <sub>1</sub>                                                                                         | R212                                                            | P213T <sub>1</sub>                              | Q214                                                                                                                                     |                                   |                                                                                                |
| <div><div>No mutation</div><div>0.1-5%</div><div>6-20%</div><div>20-50%</div><div>&gt;50%</div></div> |                       |                    |                                                  |                                   |                                                                                                            |                                                                 |                                                 |                                                                                                                                          |                                   |                                                                                                |

**Figure S2. Frequency of amino acid substitutions detected at each HDAg genotype-1 position.** The sequence of HDAg (1-214 aa) is colored according to the frequency of mutations observed at each position of HDAg functional domains in 47 plasma samples from HBV+HDV infected patients (all infected with HDV genotype 1). Wild-type amino acid is reported on the left while mutated amino acid on the right of each position. The absolute frequency of each mutation is reported in substrict. \* indicates the presence of stop codon at a given position.
